# Supplementary material
Source: PubMed Central journal article supplement (PMC4775104)
Supplement: supp_pp.15.01173_PP2015-01173R1_Supplemental_Figures.pdf [file supp_pp.15.01173_PP2015-01173R1_Supplemental_Figures.pdf]

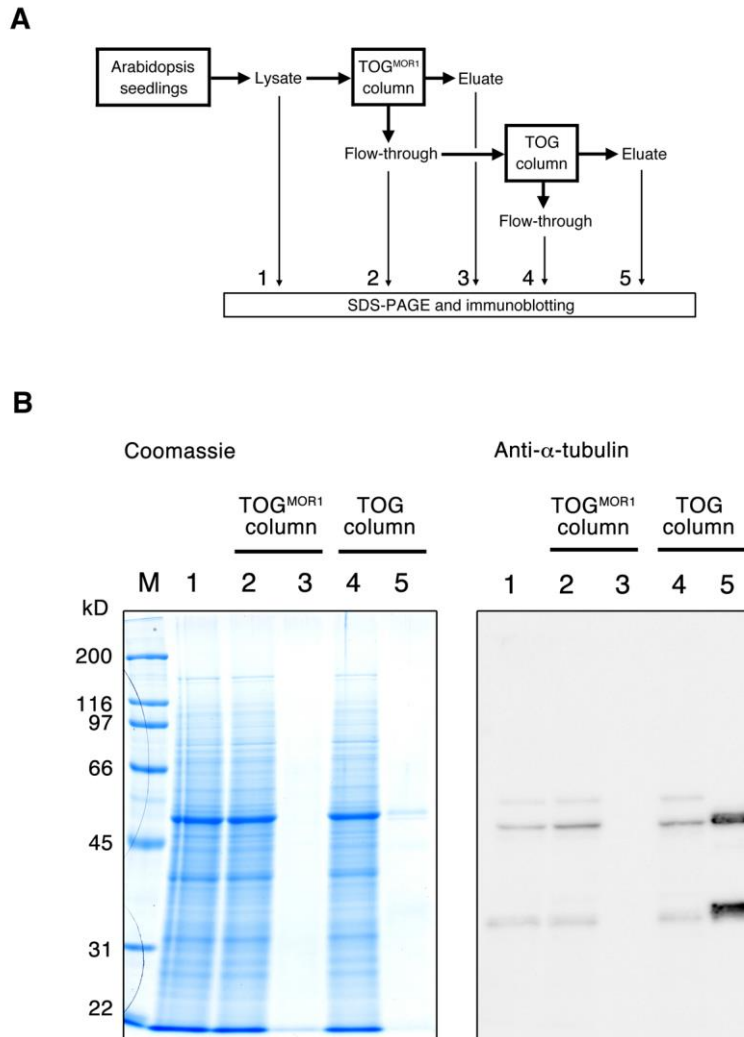

**Supplemental Figure S1.** A TOG<sup>MOR1</sup> column does not bind tubulin. A, Experiment flow chart. Crude proteins extracted from Arabidopsis seedlings (fraction 1) were first loaded onto a TOG<sup>MOR1</sup> column and then eluted (fraction 3). The flow-through fraction (fraction 2) was applied to the TOG column, and its flow-through fraction (fraction 4) and the eluate (fraction 5) were analyzed. B, Protein samples were separated by SDS-PAGE, and analyzed by Coomassie staining (left) and immunoblotting with anti- $\alpha$ -tubulin antibody (right). M, molecular mass marker; Fraction 1, 5  $\mu$ l of crude cell extract containing 12.4  $\mu$ g of protein; fraction 2, 5  $\mu$ l of the flow-through fraction from the TOG<sup>MOR1</sup> column; fraction 3, eluted, desalted, and concentrated fraction (200 ng protein) after separation on the TOG<sup>MOR1</sup> column; fraction 4, 5  $\mu$ l of the flow-through fraction from the TOG column; fraction 5, eluted, desalted, and concentrated fraction (200 ng protein) after separation on the TOG column. Protein amounts were estimated by the Bradford assay.

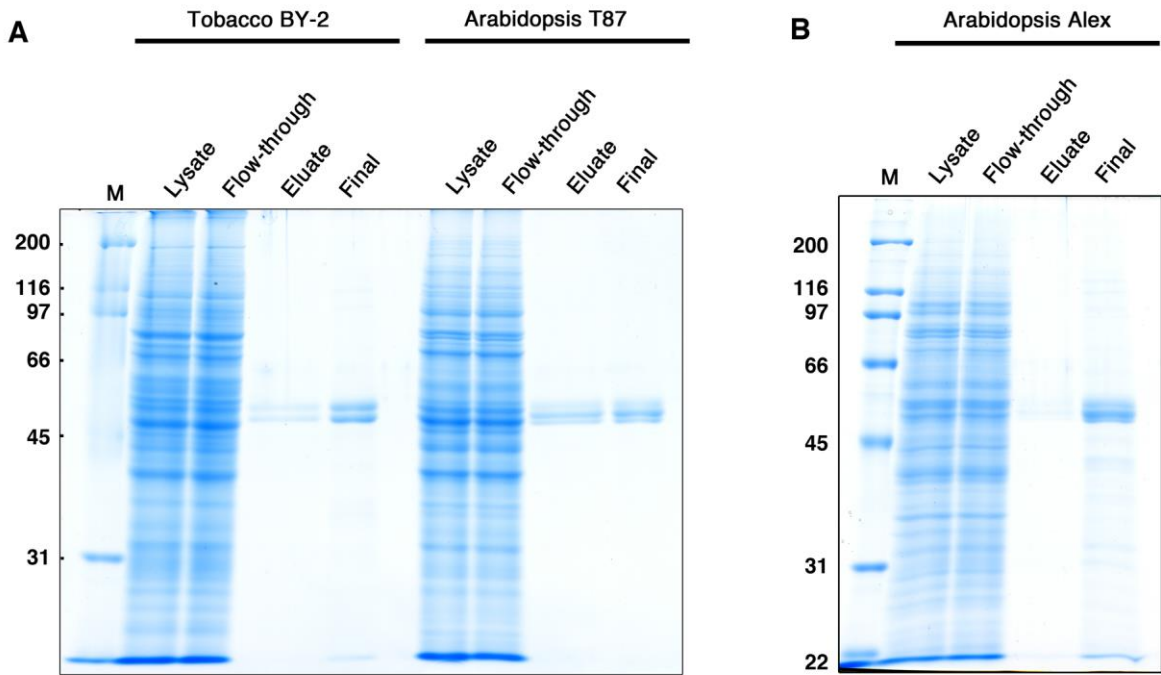

**Supplemental Figure S2.** Purification of tubulin from various plant cell cultures. Protein samples were separated by SDS-PAGE and analyzed by Coomassie staining. A, Purification of tubulin from tobacco BY-2 cells (left) and Arabidopsis T87 cells (right). Lysates, 15  $\mu$ g protein for BY-2 and 17  $\mu$ g for T87; flow-through fractions, 5  $\mu$ l; eluates from the TOG column, 10  $\mu$ l; and desalted and concentrated tubulin, 0.5  $\mu$ g. B, Purification of tubulin from Arabidopsis Alex cells. Lysate, 12  $\mu$ g protein; flow-through fraction, 3.5  $\mu$ l; eluate, 10  $\mu$ l; and desalted and concentrated fraction, 705 ng tubulin. M, molecular mass makers.



|       |      | Loop 1 |                       | Loop 2 |                        |
|-------|------|--------|-----------------------|--------|------------------------|
| Stu2p | TOG1 | 17     | RLTY <b>KLWKA</b> 25  | 66     | DSNV <b>VVAQ</b> 72    |
| MOR1  | TOG1 | 20     | RLGHKN <b>WKV</b> 28  | 64     | DSNAP <b>VQ</b> 70     |
| Stu2p | TOG2 | 335    | RITSS <b>KWKD</b> 343 | 383    | DANI <b>QAV</b> 389    |
| MOR1  | TOG2 | 294    | GVKAT <b>KWSE</b> 302 | 337    | DVNL <b>LAVA</b> 343   |
|       |      | Loop 3 |                       | Loop 5 |                        |
| Stu2p | TOG1 | 112    | LTSS <b>RATT</b> 119  | 192    | AGH <b>GDRNVRS</b> 201 |
| MOR1  | TOG1 | 109    | ----- <b>NT</b> 110   | 178    | FDH <b>QDQNVRA</b> 187 |
| Stu2p | TOG2 | 424    | TKE <b>KKPSV</b> 431  | 511    | VND <b>TQPAIRT</b> 520 |
| MOR1  | TOG2 | 376    | LKE <b>KKQSV</b> 383  | 455    | LNDG <b>TPDVRD</b> 464 |

**Supplemental figure S4.** Comparison of the TOG1 and TOG2 domains of Stu2 and Arabidopsis MOR1. Amino acid residues that contribute to tubulin-binding in Stu2 TOG1 are shown in bold. The corresponding residues, if conserved, are also highlighted in bold in Stu2 TOG2, as well as in TOG1 and TOG2 of MOR1.

**Supplemental Movie S1.** Time-lapse movie of MT dynamics for porcine tubulin at 7.5  $\mu\text{M}$ , corresponding to Fig. 2A, upper panel. Acquisition, every 3 sec for 30 min; frame rate, 100 fps; scale bar, 5  $\mu\text{m}$ .

**Supplemental Movie S2.** Time-lapse movie of MT dynamics for porcine tubulin at 15  $\mu\text{M}$ , corresponding to Fig. 2A, lower panel. Acquisition, every 3 s for 30 min; frame rate, 100 fps; scale bar, 5  $\mu\text{m}$ .

**Supplemental Movie S3.** Time-lapse movie of MT dynamics for Arabidopsis tubulin at 7.5  $\mu\text{M}$ , corresponding to Fig. 2B, upper panel. Acquisition, every 3 s for 30 min; frame rate, 100 fps; scale bar, 5  $\mu\text{m}$ .

**Supplemental Movie S4.** Time-lapse movie of MT dynamics for Arabidopsis tubulin at 15  $\mu\text{M}$ , corresponding to Fig. 2B, lower panel. Acquisition, every 3 s for 30 min; frame rate, 100 fps; scale bar, 5  $\mu\text{m}$ .
